# Supplementary material for: Harnessing Endophytic Fungi for Enhancing Growth, Tolerance and Quality of Rose-Scented Geranium (Pelargonium graveolens (L’Hér) Thunb.) Plants under Cadmium Stress: A Biochemical Study
Source: MDPI journal article supplement (doi:10.3390/jof7121039), 2021-12-03
Supplement: s1 [file s1]

**Table S1.** Two-way ANOVA (df, F-value and probability) for geranium total leaves fresh weight and biochemical analyses as affected by endophytic fungi inoculation (E), cadmium stress (Cd) and their interaction (E× Cd) effect.

| <i>Sou<br/>rce</i> | <i>d<br/>f</i> | <i>leaves fresh<br/>weight</i> | <i>Cd</i>    | <i>K</i>    | <i>Ca</i>                         | <i>Mg</i>                          | <i>P</i>                              | <i>Na</i>     | <i>Fe</i>               |
|--------------------|----------------|--------------------------------|--------------|-------------|-----------------------------------|------------------------------------|---------------------------------------|---------------|-------------------------|
| <i>E</i>           | 3              | 17.54****                      | 2.5          | 12.9****    | 15.2**<br>**                      | 15.7****                           | 17.6****                              | 14.8****      | 9.9***                  |
| <i>Cd</i>          | 1              | 0.308                          | 494.7***     | 5.9*        | 3.2                               | 1.7                                | 0.42                                  | 0.003         | 0.38                    |
| <i>E×<br/>Cd</i>   | 3              | 1.003                          | 2.5          | 8.8***      | 4.6*                              | 6.1**                              | 6.4**                                 | 2.1           | 3.8*                    |
| <i>Err<br/>or</i>  |                | (44)                           | (24)         | (24)        | (24)                              | (24)                               | (24)                                  | (24)          | (24)                    |
| <i>Sou<br/>rce</i> | <i>d<br/>f</i> | <i>Cu</i>                      | <i>Mn</i>    | <i>Zn</i>   | <i>H<sub>2</sub>O<sub>2</sub></i> | <i>Lipid<br/>peroxidati<br/>on</i> | <i>SOD</i>                            | <i>POX</i>    | <i>CAT</i>              |
| <i>E</i>           | 3              | 11.1****                       | 16.5****     | 17.6****    | 157.8*<br>***                     | 55.17****                          | 15,86***                              | 16.72***<br>* | 4.803**                 |
| <i>Cd</i>          | 1              | 0.05                           | 1.2          | 0.08        | 1.320                             | 17.57***                           | 3.156                                 | 45.84***<br>* | 0.0090                  |
| <i>E×<br/>Cd</i>   | 3              | 3.8*                           | 3.7*         | 4.3*        | 7.941*<br>*                       | 9.419***                           | 1.309                                 | 4.936**       | 3.179*                  |
| <i>Err<br/>or</i>  |                | (24)                           | (24)         | (24)        | (16)                              | (16)                               | (24)                                  | (24)          | (24)                    |
| <i>Sou<br/>rce</i> | <i>d<br/>f</i> | <i>APX</i>                     | <i>MDHAR</i> | <i>DHAR</i> | <i>GR</i>                         | <i>GPX</i>                         | <i>Antioxid<br/>-ant<br/>activity</i> | <i>FRAP</i>   | <i>PAL<br/>activity</i> |
| <i>E</i>           | 3              | 7.605***                       | 7.742***     | 87.81****   | 14.44*<br>***                     | 24.96****                          | 15.59***<br>*                         | 0.665         | 69.10****               |
| <i>Cd</i>          | 1              | 2.751                          | 2.75         | 83.70****   | 20.23*<br>**                      | 22.91****                          | 0.05                                  | 13.47**       | 6.336*                  |
| <i>E×<br/>Cd</i>   | 3              | 0.3232                         | 4.954**      | 4.655*      | 7.969*<br>**                      | 12.54****                          | 7.16**                                | 2.129         | 4.282*                  |
| <i>Err<br/>or</i>  |                | (24)                           | (24)         | (24)        | (24)                              | (24)                               | (16)                                  | (16)          | (16)                    |

| <i>Source</i>           | <i>d</i><br><i>f</i> | <i>Flavonoid-s</i>                             | <i>GST</i>                                 | <i>GSH</i>                     | <i>Phytochel-</i><br><i>atins</i> | <i>MTs</i>          | $\beta$ -<br><i>Cryptoxanthin</i><br>( <i>Vit A</i> ) | <i>Thiamine</i> ( <i>Vit B</i> ) | <i>Phylloquinone</i> ( <i>Vit K</i> ) |
|-------------------------|----------------------|------------------------------------------------|--------------------------------------------|--------------------------------|-----------------------------------|---------------------|-------------------------------------------------------|----------------------------------|---------------------------------------|
| <i>E</i>                | 3                    | 9.390***                                       | 3.058*                                     | 3.087                          | 18.46***                          | 8.103**             | 16.4****                                              | 17.4****                         | 18.8****                              |
| <i>Cd</i>               | 1                    | 0.7232                                         | 72.39****                                  | 0.1544                         | 204.9***                          | 168.7****           | 28.7****                                              | 29.6****                         | 31****                                |
| <i>E</i> ×<br><i>Cd</i> | 3                    | 4.051*                                         | 2.659                                      | 3.941*                         | 11.83**                           | 3.060               | 10.93***                                              | 11.4****                         | 12****                                |
| <i>Error</i>            |                      | (16)                                           | (16)                                       | (16)                           | (16)                              | (16)                | (24)                                                  | (24)                             | (24)                                  |
| <i>source</i>           | <i>d</i><br><i>f</i> | $\alpha$ - <i>Carotene</i><br>( <i>Vit A</i> ) | $\beta$ - <i>Carotene</i> ( <i>Vit A</i> ) | <i>ASC</i><br>( <i>Vit C</i> ) | <i>Tocopherols</i>                | <i>citronellol</i>  | <i>trans-geraniol</i>                                 | <i>Isomenthone</i>               | <i>linalool</i>                       |
| <i>E</i>                | 3                    | 24.5****                                       | 28.3****                                   | 7.608**                        | 3.395*                            | 8.848***            | 6.053**                                               | 6.837**                          | 12.80***<br>*                         |
| <i>Cd</i>               | 1                    | 33.8****                                       | 30.6****                                   | 0.6345                         | 3.1                               | 10.39**             | 12.12**                                               | 4.677*                           | 0.0997                                |
| <i>E</i> ×<br><i>Cd</i> | 3                    | 13.9****                                       | 13.9***                                    | 7.357**                        | 0.594                             | 2.759               | 3.282*                                                | 1.194                            | 6.648**                               |
| <i>Error</i>            |                      | (24)                                           | (24)                                       | (16)                           | (16)                              | (24)                | (24)                                                  | (24)                             | (24)                                  |
| <i>source</i>           | <i>d</i><br><i>f</i> | <i>Geranylacetate</i>                          | <i>cadinene</i>                            | <i>geranylbutyrate</i>         | <i>Geranyltiglate</i>             | <i>Germacrene D</i> | <i>caryophyll-ene oxide</i>                           | <i>Geraniol</i>                  | <i>C/G%</i>                           |
| <i>E</i>                | 3                    | 6.25**                                         | 8.26***                                    | 6.885**                        | 5.081*<br>*                       | 9.540***            | 10.30***                                              | 22.49***<br>*                    | 4.71*                                 |
| <i>Cd</i>               | 1                    | 9.265**                                        | 3.219                                      | 0.371                          | 1.319                             | 2.278               | 10.55**                                               | 19.30***                         | 0.28                                  |
| <i>E</i> ×<br><i>Cd</i> | 3                    | 1.967                                          | 1.392                                      | 0.973                          | 9.241*<br>**                      | 5.107**             | 2.606                                                 | 2.877                            | 1.56                                  |
| <i>Error</i>            |                      | (24)                                           | (24)                                       | (24)                           | (24)                              | (24)                | (24)                                                  | (24)                             | (24)                                  |
| <i>source</i>           | <i>d</i><br><i>f</i> | <i>Oil yield</i> (%)                           | <i>Total oil/fresh weight</i>              |                                |                                   |                     |                                                       |                                  |                                       |

|                         |   |           |           |
|-------------------------|---|-----------|-----------|
| <i>E</i>                | 3 | 15.29**** | 115.6**** |
| <i>Cd</i>               | 1 | 47.93**** | 31.67**** |
| <i>E</i> ×<br><i>Cd</i> | 3 | 2.57      | 8.79***   |
| <i>Err</i><br><i>or</i> |   | (24)      | (24)      |
